# Supplementary material for: Effects of Bacillus thuringiensis (Bt) gene on potassium efficiency of cotton (Gossypium hirsutum L.)
Source: Research Square preprint supplement (doi:10.21203/rs.3.rs-1849752/v1), 2022-07-26

Fig. S1. The content of Bt protein in the youngest mature leaves of wild type (WT, Jihe 321) and *Bacillus thuringiensis* (*Bt*) gene transgenic lines (*OE*-29317 and *OE*-29312). Each value is the mean of three replications. Bars with different letters differ significantly (*P* < 0.05) on the same day. Error bars depict standard errors of the mean.


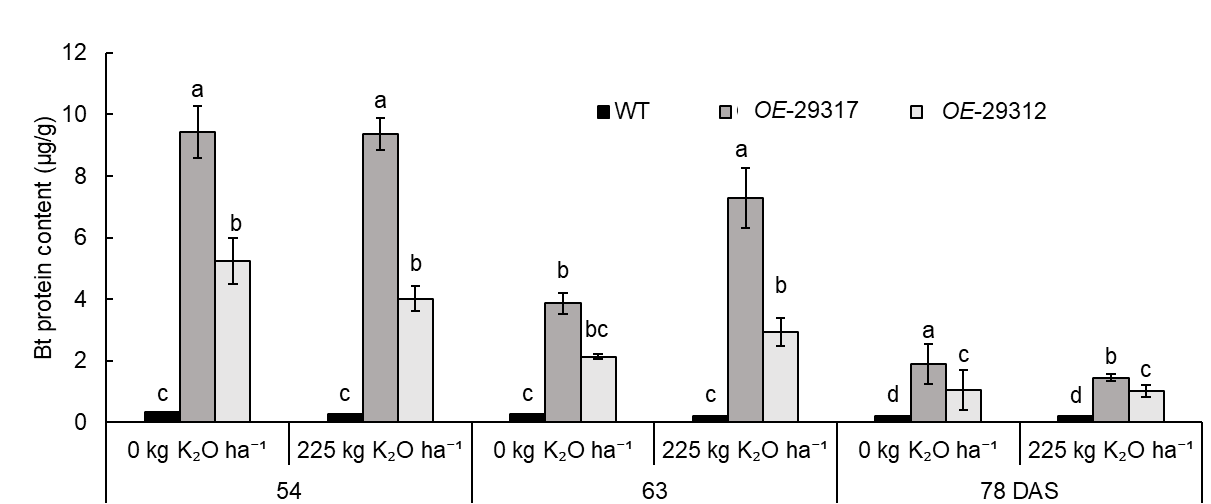

Supplement: Supplementary file 1 [file e3f9aad1994eeb5808ae2fcc.docx]
